# Supplementary material for: Liver GlucokinaseA456VInduces Potent Hypoglycemia without Dyslipidemia through a Paradoxical Induction of the Catalytic Subunit of Glucose-6-Phosphatase
Source: Hindawi journal article supplement (doi:10.1155/2011/707928), 2011-01-01

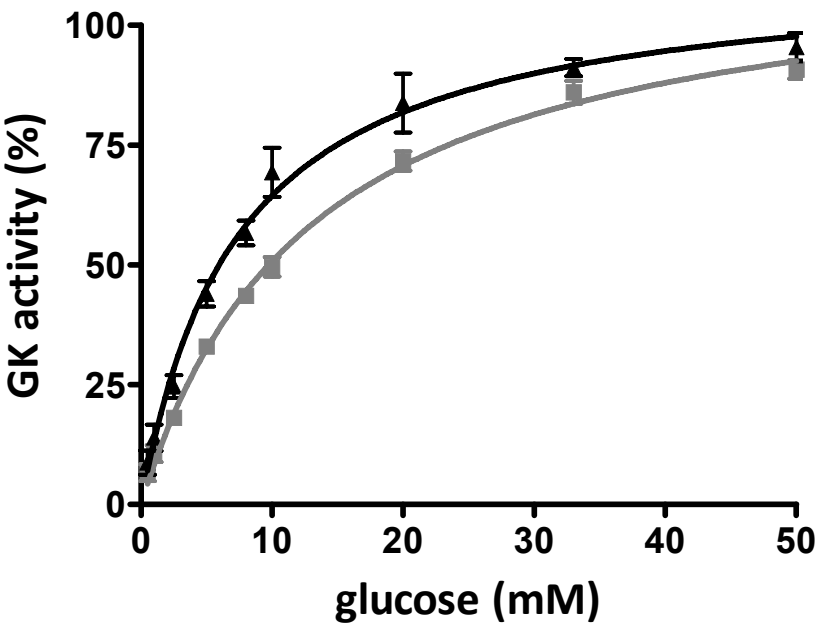

Supplement: f1 [file 707928.f1.pdf]
